1 **Evidence of stock connectivity, hybridization and misidentification in white**  
2 **anglerfish support the need of a genetics-informed fisheries management framework**

3 **Running title: White anglerfish genetics and management**

4 Imanol Aguirre-Sarabia<sup>1</sup>, Natalia Díaz-Arce<sup>1</sup>, Iker Pereda-Agirre<sup>1</sup>, Iñaki Mendibil<sup>1</sup>,  
5 Agurtzane Urtizbera<sup>1</sup>, Hans D. Gerritsen<sup>2</sup>, Finlay Burns<sup>3</sup>, Ian Holmes<sup>4</sup>, Jorge Landa<sup>5</sup>,  
6 Ilaria Coscia<sup>6</sup>, Iñaki Quinconces<sup>1</sup>, Marina Santurtún<sup>1</sup>, Antonella Zanzi<sup>7</sup>, Jann T.  
7 Martinsohn<sup>7</sup>, Naiara Rodríguez-Ezpeleta<sup>1\*</sup>

8 <sup>1</sup> AZTI, Marine Research, Basque Research and Technology Alliance (BRTA).

9 Txatxarramendi ugarte z/g, 48395 Sukarrieta – Bizkaia, Spain

10 <sup>2</sup> Fisheries Ecosystems Advisory Services, Marine Institute, Rinville, Oranmore Co.

11 Galway, H91 R673 Ireland

12 <sup>3</sup> Marine Scotland Science, Marine Laboratory, PO Box 101, Victoria Road, Torry,

13 Aberdeenshire, AB11 9DB, Scotland, UK

14 <sup>4</sup> Centre for Environment, Fisheries and Aquaculture Science, Lowestoft Laboratory

15 Pakefield Road NR33 0HT Lowestoft Suffolk United Kingdom

16 <sup>5</sup> Instituto Español de Oceanografía (IEO), Centro Oceanográfico de Santander.

17 Promontorio San Martín, s/n, 39004 Santander, Spain.

18 <sup>6</sup> University of Salford, School of Science, Engineering and Environment, The Crescent,

19 Salford, M5 4WT, England, UK

20 <sup>7</sup> European Commission, Joint Research Centre (JRC), Via Enrico Fermi 2749, 21027

21 Ispra, Italy

22 \* Correspondence: [nrodriguez@azti.es](mailto:nrodriguez@azti.es)

23

24

25 **Abstract**

26 Understanding population connectivity within a species as well as potential  
27 interactions with its close relatives is crucial to define management units and to derive  
28 efficient management actions. However, although genetics can reveal mismatches  
29 between biological and management units and other relevant but hidden information  
30 such as species misidentification or hybridization, the uptake of genetic methods by  
31 the fisheries management process is far from having been consolidated. Here, we have  
32 assessed the power of genetics to better understand the population connectivity of  
33 white angelfish (*Lophius piscatorius*) and its interaction with its sister species, the black  
34 anglerfish (*L. budegassa*). Our analyses, based on thousands of genome-wide single  
35 nucleotide polymorphisms, show three findings that are crucial for white anglerfish  
36 management. We found i) that white anglerfish is likely composed of a single  
37 panmictic population throughout the Northeast Atlantic, challenging the three-stock  
38 based management, ii) that a fraction of specimens classified as white anglerfish using  
39 morphological characteristics are genetically identified as black anglerfish (*L.*  
40 *budegassa*) and iii) that the two *Lophius* species naturally hybridize leading to a  
41 population of hybrids of up to 20% in certain areas. Our results set the basics for a  
42 genetics-informed white anglerfish assessment framework that accounts for stock  
43 connectivity, revises and establishes new diagnostic characters for *Lophius* species  
44 identification and evaluates the effect of hybrids in the current and future assessments  
45 of the white anglerfish. Furthermore, our study contributes to provide additional  
46 evidence of the potentially negative consequences of ignoring genetic data for  
47 assessing fisheries resources.

48 **Key-words:** *Lophius piscatorius*, *Lophius budegassa*, genetic connectivity,  
49 hybridization, misidentification, SNPs, stock delimitation

## 50 **Introduction**

51 Sustainable exploitation of fisheries resources relies on effective fisheries management  
52 actions, which in turn rely on accurate fisheries assessment, that is, the process that  
53 includes the synthesis of information on life history, fishery monitoring, and resource  
54 surveys for estimating stock size and harvest rate relative to sustainable reference  
55 points (Methot & Wetzel, 2013). The process of fisheries assessment is usually applied  
56 independently to pre-established management units (so-called stocks), of which  
57 parameters such as growth, recruitment, and natural and fishing mortality are  
58 assumed to be intrinsic and not dependent on emigration or immigration rates (Cadrin,  
59 2020). Genetic data has demonstrated ability to delineate populations within a species,  
60 that is, to identify groups of sexually interbreeding individuals which possess a  
61 common gene pool, but has also revealed hidden phenomena such as species  
62 misidentification (Garcia-Vazquez, Machado-Schiaffino, Campo, & Juanes, 2012) or  
63 hybridization (Pampoulie et al., 2020).

64 Fisheries stocks are often defined upon political and administrative considerations  
65 (Stephenson, 2002); yet, failure to align stocks with natural populations results in  
66 unfeasibility to establish an accurate relationship between productivity and harvest  
67 rates and can result in local reduction of populations and, in extreme cases, to local  
68 population collapse (Bonfil, 2005). Misidentification can be a common phenomenon  
69 when morphologically similar species are caught simultaneously, and results in misled  
70 exploitation rate estimations when those are based on reported catches (Marko et al.,  
71 2004). Hybridization, the successful reproduction between different species (Arnold,

72 1997; Stronen & Paquet, 2013), has been reported in teleost fishes (Schwenke, 2013;  
73 Yaakub, Bellwood, van Herwerden, & Walsh, 2006), but incidence and associated  
74 consequences in commercial fisheries has been scarcely explored (Epifanio & Nielsen,  
75 2000); yet, hybridization could play a key role in diversity loss and even parental  
76 species extinction, which has important consequences for management and  
77 conservation (Allendorf, Leary, Spruell, & Wenburg, 2001). An example of species  
78 whose management could largely benefit from genetic-derived information is the  
79 white anglerfish (*Lophius piscatorius*, Linnaeus, 1758), a bottom-living fish that moved  
80 from being a bycatch species in the last century (Hislop et al., 2001) to become one of  
81 the most valuable demersal species in southern and western Europe (ICES, 2010).

82 The white anglerfish inhabits the Northeast Atlantic and Mediterranean Sea, where it  
83 is assessed by the International Council for the Exploration of the Sea (ICES) and the  
84 General Fisheries Commission for the Mediterranean (GFCM), respectively. Within the  
85 Northeast Atlantic, the white anglerfish is managed as three stocks (Figure 1): the  
86 Northern Shelf stock (Skagerrak, Kattegat, North Sea, West of Scotland and Rockall),  
87 the Northern stock (Celtic Seas and Northern Bay of Biscay) and the Southern Stock  
88 (Atlantic and Iberian waters) (ICES, 2019a, 2019b); yet, the few studies assessing the  
89 population structure, based on otolith shape analysis (Cañás, Stransky, Schlickeisen,  
90 Sampedro, & Fariña, 2012), tagging surveys (J. Landa, Quincoces, Duarte, Fariña, &  
91 Dupouy, 2008; Laurenson, Johnson, & Priede, 2005) and molecular markers, including  
92 allozymes (Crozier, 1987), mitochondrial DNA (Charrier et al., 2006) and microsatellites  
93 (Blanco, Borrell, Cagigas, Vázquez, & Prado, 2008), did not find differences between  
94 stocks. However, this needs to be confirmed with the analysis of a large number of  
95 genomic markers, which has been effective in resolving the population structure of

96 marine fish when other markers failed (Leone, Álvarez, García, Saborido-Rey, &  
97 Rodríguez-Ezpeleta, 2019; Rodríguez-Ezpeleta et al., 2016; Rodríguez-Ezpeleta et al.,  
98 2019). The white anglerfish coexists with its sympatric sister species, the black bellied  
99 anglerfish (*Lophius budegassa*), which has a more southern distribution (Relini, 1999;  
100 Ungaro et al., 2002). The outer morphology of both species is similar which is why they  
101 are often confused, although the color of the epithelium that covers the abdominal  
102 cavity, called peritoneum (white in *L. piscatorius* and black in *L. budegassa*) is  
103 considered a unequivocal diagnostic character for individuals larger than 15 cm  
104 (Caruso, 1986). Yet, genetic analyses based on polymerase chain reaction amplification  
105 of restriction fragment length polymorphisms (PCR-RFLP) used for species  
106 identification have revealed mislabeling among the two species (Armani et al., 2012).  
107 There is thus a need for resolving the population structure of white anglerfish within  
108 the Northeast Atlantic, including its relationship with Mediterranean populations, and  
109 for understanding its interaction with its sister species, the black anglerfish. For that  
110 aim, we have used thousands of genome-wide distributed SNP markers discovered and  
111 genotyped through restriction site associated DNA sequencing (RAD-seq) and found i)  
112 that white anglerfish from the three stocks within the Northeast Atlantic are  
113 genetically connected, ii) first evidence of hybridization between white and black  
114 anglerfish and iii) records of black anglerfish misidentified as white anglerfish due to a  
115 lack of black peritoneum. These findings have important implications for white  
116 anglerfish management and conservation, while revealing the significant advantage of  
117 including genomics in fisheries assessment in general.

118

119 **Material and methods**

120 *Tissue sampling, DNA extraction, and species identification*

121 *Lophius piscatorius* (n=693) and *Lophius budegassa* (n=31) samples were collected  
122 from Northeast Atlantic Ocean and Mediterranean Sea locations using scientific  
123 surveys and commercial fisheries (Table S1; Figure 1). Sampling of *L. piscatorius* was  
124 carried out so as to cover a large part of the geographic range of this species within the  
125 Atlantic, whereas samples of *L. budegassa* were collected opportunistically as they  
126 were only used for comparison purposes. Each individual was assigned to either  
127 species by the color of the peritoneum, white for *L. piscatorius* and black for *L.*  
128 *budegassa* (Caruso, 1986). Maturity was assigned following the 5 stages key (ICES,  
129 2007). From each individual, a ~1 cm<sup>3</sup> muscle tissue sample was excised and  
130 immediately stored in 96% molecular grade ethanol at -20 °C until DNA extraction.  
131 Genomic DNA was extracted from about 20 mg of muscle tissue using the Wizard®  
132 Genomic DNA Purification kit (Promega, WI, USA) following the manufacturer's  
133 instructions. Extracted DNA was suspended in Milli-Q water and concentration was  
134 determined with the Quant-iT dsDNA HS assay kit using a Qubit® 2.0 Fluorometer (Life  
135 Technologies). DNA integrity was assessed by electrophoresis, migrating about 100 ng  
136 of Sybr™ Safe-stained DNA on an agarose 1.0% gel. A polymerase chain reaction  
137 restriction fragment length polymorphism (PCR-RFLP) method based on mitochondrial  
138 DNA (Armani et al., 2012) was used for authentication of all specimens collected. In  
139 order to further validate the PCR-RFLP results, for 122 of the samples, a fragment of  
140 the mitochondrial cytochrome b (cytb) gene was amplified with the primers GluFish-F  
141 and THR-Fish-R (Sevilla et al., 2007) using the following amplification conditions:  
142 denaturation at 95 °C for 3 min; 35 cycles at 95 °C for 30 s, 57 °C for 30 s, 72 °C for 60 s;

143 and final extension at 72 °C for 10 min. The PCR products were purified and sequenced  
144 using Sanger.

#### 145 *RAD-seq library preparation and sequencing*

146 Restriction-site-associated DNA libraries were prepared for 306 *L. piscatorius* and 27 *L.*  
147 *budegassa* individuals (Table S1) following the methods of Etter, Bassham, Hohenlohe,  
148 Johnson, and Cresko (2012). Five individuals were run by duplicate starting from the  
149 tissue sample to check for replicability. Between 300 and 600 ng of starting DNA  
150 (depending on integrity) was digested with the *SbfI* restriction enzyme and ligated to  
151 modified Illumina P1 adapters containing 5bp sample-specific barcodes. Pools of 32  
152 individuals were sheared using the Covaris® M220 Focused-ultrasonicator™ Instrument  
153 (Life Technologies) and size selected to 300-500 bp with magnetic beads. Following the  
154 Illumina P2 adaptor ligation, each library was amplified using 12 PCR cycles and  
155 batches of three pools were paired-end sequenced (100 bp) on an Illumina HiSeq4000.

#### 156 *SNP genotype table generation*

157 Generated RAD-tags were analyzed using *Stacks* version 2.4 (Catchen, Hohenlohe,  
158 Bassham, Amores, & Cresko, 2013). Quality filtering and demultiplexing were per-  
159 formed using the *Stacks* module *process\_radtags* removing reads with ambiguous ba-  
160 ses and with an average quality score lower than 20 in at least one stretch of 15 nucle-  
161 otides and using a maximum of 1 mismatch when rescuing single-end barcodes. Only  
162 reads whose forward and reverse pair passed quality filtering were kept and the mod-  
163 ule *clone\_filter* was applied to remove PCR duplicates. *De novo* and reference-based  
164 assemblies were performed for consistency since each approach has disadvantages:  
165 the genome used for the reference-based approach is highly fragmented (Dubin,  
166 Jørgensen, Moum, Johansen, & Jakt, 2019) and represents only one of the species in-

167 cluded in this study, and the *de novo* approach could be affected by assembly parame-  
168 ters choice. For the *de novo* assembly, the module *ustacks* was used to assemble fil-  
169 tered reads into putative orthologous loci per individual, with a minimum coverage  
170 depth required to create a stack (parameter -m) of 3, and a maximum nucleotide mis-  
171 matches allowed between stacks (parameter -M) of 4. RAD-loci were then assembled  
172 using the module *cstacks* with a maximum of 6 allowed mismatches between sample  
173 loci when generating the catalogue (parameter -n). Matches to the catalogue for each  
174 sample were searched using *sstacks* and transposed using *tsv2bam*. For the reference  
175 mapped assembly, the filtered reads were mapped against the available draft white  
176 anglerfish genome (Dubin et al., 2019) using the BWA-MEM algorithm (Li, 2013), and  
177 the resulting SAM files converted to BAM format, sorted and indexed using SAMTOOLS  
178 (Li et al., 2009). Mapped reads were filtered to include only primary alignments and  
179 correctly mate mapped reads. The following steps were applied to both the *de novo*  
180 and reference mapped catalogs including only samples with a minimum of 30,000  
181 RAD-loci. Paired-end reads were assembled into contigs and SNPs derived were identi-  
182 fied and genotyped using the module *gstacks*. In order to avoid ascertainment bias  
183 (Rodríguez-Ezpeleta et al., 2016), SNP selection was performed separately on each  
184 subset of individuals to be analyzed (Table S2). For that aim, the module *populations*  
185 was used to select the tags present in RAD-loci found in at least 90% of the individuals,  
186 and *PLINK* version 1.07 (Purcell et al., 2007) was used to select samples with a mini-  
187 mum of 0.85 genotyping rate, and SNPs with a minimum of 0.95 genotyping rate and a  
188 minimum allele frequency (MAF) bigger than 0.05. Tags on which the selected SNPs  
189 were located were mapped against the complete mitochondrial genome of *Lophius*



190 *piscatorius* (NC\_036988.1) with the BWA-MEM algorithm (Li, 2013) and it was con-  
191 firmed that the final genotype dataset did not contain mitochondrial SNPs.

#### 192 *Genetic diversity, population structure and hybridization analyses*

193 The following analyses were performed using only the first SNP per tag. Expected ( $H_e$ )  
194 and observed ( $H_o$ ) heterozygosity and average pairwise  $F_{ST}$  values were computed with  
195 PLINK (Purcell, 2009) and GENEPOP (Rousset, 2014) respectively. Principal component  
196 analysis (PCA) was performed without any *a priori* assignment of individuals to  
197 populations using the package *adegenet* (Jombart & Ahmed, 2011) in R version 3.5.0  
198 (Team, 2018). The genetic ancestry of each individual was estimated using the model-  
199 based clustering method implemented in ADMIXTURE (Alexander, Shringarpure,  
200 Novembre, & Lange, 2015) assuming from 2 to 5 ancestral populations ( $K$ ) and setting  
201 1000 bootstrap runs. The value of  $K$  with the lowest associated error value was  
202 identified using ADMIXTURE's cross-validation procedure assuming from 1 to 5  
203 ancestral populations. Using *NewHybrids* (E. Anderson & Thompson, 2002), posterior  
204 probabilities of each individual's membership as a pure parent, first (F1) or second (F2)  
205 generation hybrids or backcrosses were calculated applying default parameters to the  
206 200 SNPs with less than 1% of missing data that presented the highest  $F_{ST}$  between  
207 genetically assigned *L. piscatorius* and *L. budegassa* samples.

208

## 209 **Results**

### 210 *Genetic species identification based on mitochondrial markers*

211 In all samples for which it was conducted, *cytb* gene sequencing confirmed PCR-RFLP  
212 results (Table S1). Species authentication was positive for all 31 specimens identified as  
213 *Lophius budegassa*. However, from the 693 specimens identified as *L. piscatorius*

214 based on the colour of their peritoneum, 76 were genetically identified as *L.*  
215 *budegassa*. This incongruency between the colour of the peritoneum and the  
216 mitochondrial based genetic identification (Figure 2) suggests that species  
217 identification based on the colour of the peritoneum results in erroneous taxonomic  
218 assignment or that mitochondrial markers are ambiguous for species identification,  
219 which needs to be evaluated using nuclear markers.

#### 220 *Population structure based on nuclear markers*

221 The genotype table including individuals from both species resulted in 323 and 326  
222 individuals (of which 27 were *L. budegassa*) and 16712 or 23126 SNPs after filtering  
223 when using a *de novo* or reference mapped assembly respectively (Table S2).  
224 Replicates resulted in 0.9947% identical genotypes. The PCA and ADMIXTURE analyses  
225 based on these datasets grouped most samples in three clearly distinguishable groups,  
226 and results were virtually identical among the *de novo* and reference assembly  
227 datasets (Figure 3; Figure S1) and subsequent analyses were based on the former. In  
228 the PCA (Figure 3A), samples are disposed along the first principal component  
229 (accounting for 80.82% of the total variance) into three main groups. The first group  
230 includes individuals provided, and genetically confirmed, as *L. piscatorius*. The second  
231 group (in the middle) includes 25 individuals initially identified as *L. piscatorius*,  
232 although 22 of them are assigned to *L. budegassa* according to mitochondrial DNA. The  
233 third group includes individuals initially identified as *L. piscatorius* and *L. budegassa*,  
234 but all of them assigned to *L. budegassa* according to mitochondrial DNA. Additionally,  
235 there are five individuals (all with *L. budegassa* mitochondrial DNA) located in between  
236 the main three clusters. This sample grouping is coherent with the different types of

237 genetic admixture patterns observed according to the presence of two ancestral  
238 populations, best  $K=2$  (Figure 3B): samples included in the first and third groups in the  
239 PCA are not admixed and belong to different ancestral populations, and samples  
240 included in the middle group in the PCA are admixed with equal contribution from  
241 both ancestral populations. Samples located between groups in the PCA show  
242 consistent patterns in admixture analyses with about 75% or 25% of contribution from  
243 the first and third groups, respectively.

#### 244 *Misidentification and hybridization*

245 Together, these results indicate that some of the samples morphologically identified as  
246 *L. piscatorius* are *L. budegassa* despite presenting a white peritoneum (Figure 3C).  
247 Samples in the middle group and adjacent ones have a significantly higher observed  
248 average heterozygosity (0.77) than samples in first and third groups (0.05 and 0.03,  
249 respectively), which could indicate that these individuals are hybrids. This was con-  
250 firmed by NewHybrids, which assigned all individuals in the middle group as new gen-  
251 eration hybrids between the two species (F1), and the five remaining individuals as  
252 backcrosses between F1 hybrids and white or black anglerfish (Figure 3C). Mitochon-  
253 drial DNA from all hybrids except for 3 F1 was of *L. budegassa*. Considering the propor-  
254 tion of hybrid individuals within the ones bearing *L. piscatorius* or *L. budegassa* mito-  
255 chondrial DNA as estimated from RAD-sequencing data, we calculated the percentage  
256 of hybrid and misidentified individuals among those provided as *L. piscatorius*. Overall,  
257 we found about 4 and 10% misidentified and hybrid individuals, respectively. However,  
258 these were not distributed homogeneously across stocks and areas within the same  
259 stock (Figure 4). Misidentified individuals were more present in the most southern re-

260 gion of the Southern stock (Portuguese coast) and Mediterranean Sea, with 1/3 of the  
261 individuals identified as *L. piscatorius* being *L. budegassa*, less frequent in the Northern  
262 stock (2%), and absent in Northern Shelf stock. Hybrid individuals were absent in the  
263 Southern stock and North Sea (belonging to the Northern Shelf stock) and were most  
264 frequent in the northern Bay of Biscay and Celtic seas (13%).

### 265 *Connectivity of white anglerfish within the Atlantic*

266 The genotype table including only those individuals genetically identified as *L.*  
267 *piscatorius* include 238 or 232 individuals and 6233 or 6246 SNPs when including or  
268 not Mediterranean samples, respectively. PCA and ADMIXTURE analyses based on  
269 those datasets (Figure 5) reveal strong differentiation between Mediterranean and  
270 Atlantic samples ( $F_{ST} = 0.057$ ) and no genetic differentiation within the Atlantic ( $F_{ST} =$   
271 0), as also suggested by ADMIXTURE (best  $K=1$ ).

272

## 273 **Discussion**

### 274 *What's in a white anglerfish sample?*

275 We found that several of the samples provided as white anglerfish (*Lophius*  
276 *piscatorius*) by expert scientists involved in surveys targeting anglerfish were indeed  
277 black anglerfish or hybrids. This implies that the commonly used diagnostic character  
278 for species identification, the color of the peritoneum, is not discriminative as all the  
279 black anglerfish and hybrid individuals provided as white anglerfish had white  
280 peritoneum. Indeed, it has already been suggested that some young individuals cannot  
281 be distinguished by the color of the peritoneum (*e.g.* some that show a white  
282 peritoneum with small black dots can be assigned to either black or white anglerfish

283 when using another diagnostic character such as the number of dorsal fin rays (J.  
284 Landa and A. Antolínez, unpublished data). Here, we found misidentified individuals  
285 that are large (up to 75cm), suggesting that the reason for misidentification is not  
286 related to the size of the specimens. In light of these findings, alternative  
287 characteristics for species identification are needed (e.g. dorsal and anal fin ray counts  
288 or length of the cephalic dorsal fin spines (Caruso, 1986)), so that misidentification  
289 does not affect data collection. Additionally, a way of identifying hybrids would be  
290 needed. Notably, in our dataset, the hybrid size distributions was significantly smaller  
291 than that of the *L. piscatorius* individuals ( $p < 0.05$  in the Mann-Whitney test), although  
292 the small sample size of hybrids and confounding factors (e.g. different proportion of  
293 hybrids in the different stocks, age classes) prevent drawing conclusions from this fact  
294 at this stage.

#### 295 *Causes and consequences of interspecific hybridization*

296 We provide, to the best of our knowledge, the first evidence of natural hybridization  
297 between *Lophius piscatorius* and *L. budegassa*, a phenomenon that can occur between  
298 closely related species sharing morphological, ecological and reproductive  
299 compatibilities (Montanari, Hobbs, Pratchett, Bay, & Van Herwerden, 2014). *Lophius*  
300 *spp.* hybrids were predominant in Northern Bay of Biscay and Celtic seas, where both  
301 species' distribution range overlap and have been historically abundant (Figure S2).  
302 There is also overlap in both species' bathymetric distribution (20-1000m and 100-  
303 500m depth respectively for white and black anglerfish)(Azevedo, 1995; Caruso, 1986;  
304 García-Rodríguez, Pereda, Landa, & Esteban, 2005; Quincoces, Santurtún, & Lucio,  
305 1998), and in spawning periods, both spawning in winter and spring (Ofstad, Angus,  
306 Pedersen, & Steingrund, 2013; Quincoces, 2002.). This overlap in space, depth and

307 time could have even been increased by recent changes of geographical and  
308 bathymetric distributions of both species, potentially as a consequence of climate  
309 change (Maltby, Rutterford, Tinker, Genner, & Simpson, 2020). According to  
310 mitochondrial DNA, which is maternally inherited in most animals (Moritz, Dowling, &  
311 Brown, 1987), we found that most hybrids (27 out of 30) resulted from a black  
312 anglerfish mother and a white anglerfish father. We found a few backcrosses (hybrids  
313 crossed with parental species) and no crosses involving two hybrids. This could be due  
314 the presence of a stable hybrid zone with hybrids being less able to produce offspring  
315 (Hayden et al., 2010; Mirimin et al., 2014) or to recent changes that have induced  
316 hybridization between both species so newly that they did not have time to produce a  
317 hybrid-derived population. The presence of a stable hybrid zone between black and  
318 white anglerfish does not forcedly imply changes in the evolution of the parental  
319 species but could imply management uncertainties. However, if hybridization is recent,  
320 we cannot discard a process of evolutionary novelty (Budd & Pandolfi, 2010), through  
321 parental species acquiring new functions (T. M. Anderson et al., 2009) and even  
322 producing new species (Verheyen, Salzburger, Snoeks, & Meyer, 2003), or of  
323 biodiversity loss, through extinction of parental species (Seehausen, 2006). Thus,  
324 monitoring the hybrid zone and adjacent areas is crucial to understand the role of  
325 hybridization in management and conservation of white and black anglerfish.

### 326 *Management implications of stock connectivity, hybridization and misidentification*

327 Our results show that the Northeast Atlantic and Mediterranean white anglerfish  
328 populations are genetically isolated, challenging previous findings based on genetic  
329 data (Charrier et al., 2006), and that the white anglerfish within the Northeast Atlantic  
330 Ocean constitutes a genetically homogeneous population, shedding light into previous

331 unconvulsive results based on genetic and non-genetic data (Blanco et al., 2008; Cañas  
332 et al., 2012; Crozier, 1987; Charrier et al., 2006; J. Landa et al., 2008; Laurenson et al.,  
333 2005). These results point towards the necessity to harmonize current stock definitions  
334 within the Northeast Atlantic. Morphometric characteristics such as length of maturity  
335 (Duarte, Azevedo, Landa, & Pereda, 2001) or weight-length relationships (Jorge Landa  
336 & Antolínez, 2018) differ between stocks. These differences are potentially due to  
337 sampling biases, differences in scales and/or measurement methods or interannual  
338 differences among studies, as well as the possible influence of different fishing  
339 pressure or environmental conditions between areas. However, they could also be due  
340 to the inclusion of different proportions of misidentified and hybrid individuals in each  
341 stock.

342 Although in the Northern and Southern stocks the assessment is done separately for  
343 white and black anglerfish, they are combined for management, being Total Allowable  
344 Catches (TAC) for *Lophius spp.* In the Northern Shelf stock, the two species are  
345 assessed and managed as one assuming that black anglerfish in this area are rare.  
346 However, the obvious increase of black anglerfish in this stock ([Figure S2](#)) has created  
347 concern and suggestions to separate species have been made (ICES, 2018). The  
348 deliberate (in the North Shelf stock) or non-deliberate (in the Northern and Southern  
349 stocks) inclusion of an unknown (and perhaps variable) proportion of black anglerfish  
350 in the white anglerfish assessment will likely lead to some bias. Therefore, some  
351 corrections could be applied to the total catches and the length composition data.  
352 However, the proportions of black anglerfish included in these assessments seem  
353 relatively small (<10%) and would likely not have a major impact on the assessments.  
354 The implications of including hybrids in the stock assessment are more difficult to

355 anticipate as biological characteristics of hybrids are unknown. The main concern is  
356 that inclusion of hybrids would lead to erroneous inferences of reproductive potential  
357 because this feature is inferred from the biomass of mature fish and the reproductive  
358 output of anglerfish hybrids is unknown. If, as in many other species (Mallet, 2007),  
359 they have no or neglectable offspring, they should not be included in the spawning  
360 biomass as otherwise they could lead to an overestimation of productivity, even to a  
361 level below of required to support a sustainable fishery (Morgan et al., 2012). On the  
362 other hand, if, as the presence of backcrossed individuals suggest, they are  
363 reproductively viable, further studies are required to assess hybrid fitness compared to  
364 pure individuals.

365 Despite supporting stock merging, the analyses presented here suggest a series of  
366 concerns that should be considered for white anglerfish management and which affect  
367 differently each of the stocks. The southernmost locations of the Southern Stock and  
368 the Mediterranean Sea are more affected by misidentification, the northernmost  
369 locations of the Northern stock are more affected by hybridization, and the North Shelf  
370 stock does not seem to be affected by either. The over and under representation of  
371 misidentified individuals (black anglerfish with white peritoneum) in the south and  
372 north respectively could be simply explained by differences in black anglerfish  
373 abundance. However, both species are moving northwards, as shown in the species  
374 distribution maps (FigureS2), and so the proportion of misidentified individuals could  
375 increase in northern areas as black anglerfish becomes more abundant. This northward  
376 movement of both species could also contribute to enlarge the hybrid zone towards  
377 northern areas. If the proportion of hybridization and mislabeling varies significantly  
378 over time, then this will have implications for the robustness of the assessment for



379 these stocks. Thus, genetic studies monitoring white and black anglerfish populations  
380 across the Northeast Atlantic and Mediterranean Sea through time are needed.

### 381 *Outlook*

382 Our study shows that genetic analyses can be used to confirm or reject existing  
383 hypothesis about, for example, stock connectivity but, most importantly, that they can  
384 reveal hidden phenomena that were not foreseen, such as the thus far unknown  
385 hybridization between white and black anglerfish. Yet, despite the power of genetics  
386 to provide fisheries assessment relevant information, there are still barriers for the  
387 uptake of genetic data by fisheries management, which can be due to a variety of  
388 factors (Bernatchez et al., 2017; Ovenden, Berry, Welch, Buckworth, & Dichmont,  
389 2015), such as lack of clear communication of genetic concepts by geneticists to end-  
390 users and reluctance to change or adapt established assessment and management  
391 procedures. The white anglerfish is a highly valuable species (around 30K tons with a  
392 corresponding value of around 142 million euro; data extracted from  
393 <https://stecf.jrc.ec.europa.eu/dd/fdi>) with a well-established data collection, and  
394 assessment and management frameworks. Thus, we anticipate that these results will  
395 set the basics for an imminent genetics informed fisheries management for this  
396 species. Indeed, a genetics informed fisheries management is essential to ensure the  
397 basics of fisheries science, whereby maximum sustainable yield can only be reached by  
398 efficient management of distinct populations.

### 399 **Acknowledgements**

400 We would like to thank Arkaitz Pedrajas and Arnaitz Mugerza (AZTI), Liz Clarke, Jim  
401 Drewery and Ruadhan Gillespie-Mules (MSS, Scotland), Eoghan Kelly and David Tully  
402 (MI, Ireland), Jose Carlos Fernández Franco, Ángela Cortina Burgueño and Oscar

403 Fernández Acevedo (OPPF-4, Spain), the fisheries surveys team (CEFAS), Izaskun  
404 Preciado and Susana Ruiz (IEO), Corina Chaves (IPMA, Portugal), Anabel Colmenero  
405 (ICM-CSIC, Spain), Chrysoula Gubili (FRI, Greece) and Nota Peristeraki (HCRM, Greece)  
406 for sampling and Elisabete Bilbao for laboratory work. This work has been funded by  
407 the Joint Research Centre (European Commission), through the project GECKA  
408 (Contract JRC/IPR/2017/D.2/0016/NC), the Department of Environment, Planning,  
409 Agriculture and Fisheries (Basque Government), through the project GENGES and a  
410 predoctoral grant to Imanol Aguirre-Sarabia, and by the Department of Education  
411 (Basque Government), through a predoctoral grant to Iker Pereda. This is contribution  
412 1043 from the Marine Research Division of AZTI.

#### 413 **Data availability statement**

414 Demultiplexed and quality-filtered RAD-tag reads are available at the NCBI Sequence  
415 Read Archive (SRA) under accession number SUB9963797 and final datasets and scripts  
416 utilized for this project are available at [https://github.com/rodriguez-](https://github.com/rodriguez-ezpeleta/Lophius_PopGen)  
417 [ezpeleta/Lophius\\_PopGen](https://github.com/rodriguez-ezpeleta/Lophius_PopGen)

#### 418 **Author Contributions**

419 NRE, JTM, AZ, MS, IQ and IC designed the study. HG, FB, IH and JL provided samples.  
420 IM generated data. IAS, NDA, IPA and NRE analyzed data. IAS, NRE, AU, HDG, FB, IH, JL,  
421 IQ interpreted data. IAS and NRE wrote the first draft of the manuscript and integrated  
422 input from all authors.

423

#### 424 **References**

- 425 Alexander, D. H., Shringarpure, S. S., Novembre, J., & Lange, K. (2015). Admixture 1.3 software  
426 manual. *Los Angeles: UCLA Human Genetics Software Distribution.*
- 427 Allendorf, F., Leary, R. F., Spruell, P., & Wenburg, J. (2001). The problems with hybrids: setting  
428 conservation guidelines. *Trends in Ecology and Evolution, 16*, 613-622.
- 429 Anderson, E., & Thompson, E. (2002). A model-based method for identifying species hybrids  
430 using multilocus genetic data. *Genetics, 160*(3), 1217-1229.
- 431 Anderson, T. M., Candille, S. I., Musiani, M., Greco, C., Stahler, D. R., Smith, D. W., . . .  
432 Bustamante, C. D. (2009). Molecular and evolutionary history of melanism in North  
433 American gray wolves. *Science, 323*(5919), 1339-1343.
- 434 Armani, A., Castigliero, L., Tinacci, L., Gandini, G., Gianfaldoni, D., & Guidi, A. (2012). A rapid  
435 PCR-RFLP method for the identification of *Lophius* species. *European Food Research  
436 and Technology, 235*(2), 253-263. doi:10.1007/s00217-012-1754-3
- 437 Arnold, M. L. (1997). *Natural hybridization and evolution*: Oxford University Press on Demand.
- 438 Azevedo, M. (1995). A statistical analysis of black monkfish catch rates in ICES Division IXa.  
439 *Fisheries Research, 24*(4), 281-289.
- 440 Bernatchez, L., Wellenreuther, M., Araneda, C., Ashton, D. T., Barth, J. M. I., Beacham, T. D., . . .  
441 Withler, R. E. (2017). Harnessing the Power of Genomics to Secure the Future of  
442 Seafood. *Trends in Ecology & Evolution, 32*(9), 665-680.  
443 doi:<https://doi.org/10.1016/j.tree.2017.06.010>
- 444 Blanco, G., Borrell, Y., Cagigas, M., Vázquez, E., & Prado, J. S. (2008). Microsatellites-based  
445 genetic analysis of the Lophiidae fish in Europe. *Marine and Freshwater Research,  
446 59*(10), 865-875.
- 447 Bonfil, R. (2005). Management Techniques for Elasmobranch Fisheries. In R. B. John Musick  
448 (Ed.), *FAO Fisheries Technical Paper 474* (pp. 6-14): FAO.
- 449 Budd, A. F., & Pandolfi, J. M. (2010). Evolutionary novelty is concentrated at the edge of coral  
450 species distributions. *Science, 328*(5985), 1558-1561.
- 451 Cadrin, S. X. (2020). Defining spatial structure for fishery stock assessment. *Fisheries Research,  
452 221*, 105397. doi:<https://doi.org/10.1016/j.fishres.2019.105397>
- 453 Cañás, L., Stransky, C., Schlickeisen, J., Sampedro, M. P., & Fariña, A. C. (2012). Use of the  
454 otolith shape analysis in stock identification of anglerfish (*Lophius piscatorius*) in the  
455 Northeast Atlantic. *ICES Journal of Marine Science, 69*(2), 250-256.  
456 doi:10.1093/icesjms/fss006
- 457 Caruso, J. (1986). Lophiidae. *Fishes of the North-eastern Atlantic and the Mediterranean, 3*,  
458 1362-1363.
- 459 Catchen, J., Hohenlohe, P. A., Bassham, S., Amores, A., & Cresko, W. A. (2013). Stacks: an  
460 analysis tool set for population genomics. *Molecular Ecology, 22*(11), 3124-3140.
- 461 Crozier, W. (1987). Biochemical genetic variation and population structure in angler-fish  
462 *Lophius piscatorius* L. from the Irish Sea and west of Scotland. *Journal of Experimental  
463 Marine Biology and Ecology, 106*(2), 125-136.
- 464 Charrier, G., Chenel, T., Durand, J. D., Girard, M., Quiniou, L., & Laroche, J. (2006).  
465 Discrepancies in phylogeographical patterns of two European anglerfishes (*Lophius  
466 budegassa* and *Lophius piscatorius*). *Molecular Phylogenetics and Evolution, 38*(3),  
467 742-754. doi:10.1016/j.ympev.2005.08.002
- 468 Duarte, R., Azevedo, M., Landa, J., & Pereda, P. (2001). Reproduction of anglerfish (*Lophius  
469 budegassa* Spinola and *Lophius piscatorius* Linnaeus) from the Atlantic Iberian coast.  
470 *Fisheries Research, 51*(2), 349-361. doi:[https://doi.org/10.1016/S0165-7836\(01\)00259-4](https://doi.org/10.1016/S0165-7836(01)00259-4)  
471 4
- 472 Dubin, A., Jørgensen, T. E., Moum, T., Johansen, S. D., & Jakt, L. M. (2019). Complete loss of the  
473 MHC II pathway in an anglerfish, *Lophius piscatorius*. *Biology Letters, 15*(10),  
474 20190594.

- 475 Epifanio, J., & Nielsen, J. (2000). The Role of Hybridization in the Distribution, Conservation and  
476 Management of Aquatic Species. *Reviews in Fish Biology and Fisheries*, 10(3), 245-251.  
477 doi:10.1023/a:1016729132297
- 478 Etter, P. D., Bassham, S., Hohenlohe, P. A., Johnson, E. A., & Cresko, W. A. (2012). SNP  
479 discovery and genotyping for evolutionary genetics using RAD sequencing. In  
480 *Molecular methods for evolutionary genetics* (pp. 157-178): Springer.
- 481 García-Rodríguez, M., Pereda, P., Landa, J., & Esteban, A. (2005). On the biology and growth of  
482 the anglerfish *Lophius budegassa* Spinola, 1807 in the Spanish Mediterranean: a  
483 preliminary approach. *Fisheries Research*, 71(2), 197-208.
- 484 Garcia-Vazquez, E., Machado-Schiaffino, G., Campo, D., & Juanes, F. (2012). Species  
485 misidentification in mixed hake fisheries may lead to overexploitation and population  
486 bottlenecks. *Fisheries Research*, 114, 52-55.  
487 doi:<https://doi.org/10.1016/j.fishres.2011.05.012>
- 488 Hayden, B., Pulcini, D., Kelly-Quinn, M., O'Grady, M., Caffrey, J., McGrath, A., & Mariani, S.  
489 (2010). Hybridisation between two cyprinid fishes in a novel habitat: genetics,  
490 morphology and life-history traits. *BMC Evolutionary Biology*, 10(1), 169.
- 491 Hislop, J. R., Gallego, A., Heath, M. R., Kennedy, F. M., Reeves, S. A., & Wright, P. J. (2001). A  
492 synthesis of the early life history of the anglerfish, *Lophius piscatorius* (Linnaeus, 1758)  
493 in northern British waters. *ICES Journal of Marine Science*, 58(1), 70-86.
- 494 ICES. (2007). *Report of the Workshop on Sexual Maturity Staging of Hake and Monk*  
495 *(WKMSHM), 21–24 November 2007, Lisbon, Portugal. ICES CM 2007/ACFM:34.*  
496 Retrieved from
- 497 ICES. (2010). *Report of the Working Group on the Assessment of Southern Shelf Stocks of Hake,*  
498 *Monk and Megrim (WGHMM), 5 - 11 May 2010, Bilbao, Spain, ICES Document CM*  
499 *2010/ACOM:11.* Retrieved from
- 500 ICES. (2018). *Report of the Benchmark Workshop on Anglerfish Stocks in the ICES Area*  
501 *(WKANGLER), 12–16 February 2018, Copenhagen, Denmark. ICES CM 2018/ACOM:31.*  
502 177 pp. Retrieved from
- 503 ICES. (2019a). *Working Group for the Bay of Biscay and the Iberian waters Ecoregion (WGBIE).*  
504 *ICES Scientific Reports. 1:31. 692 pp.* <http://doi.org/10.17895/ices.pub.5299>. Retrieved  
505 from <http://doi.org/10.17895/ices.pub.5299>
- 506 ICES. (2019b). Working Group for the Celtic Seas Ecoregion (WGCSE). ICES Scientific Reports.  
507 1:29. 1078 pp. <http://doi.org/10.17895/ices.pub.4982>.  
508 doi:<http://doi.org/10.17895/ices.pub.4982>
- 509 Jombart, T., & Ahmed, I. (2011). adegenet 1.3-1: new tools for the analysis of genome-wide  
510 SNP data. *Bioinformatics*, 27(21), 3070-3071. doi:10.1093/bioinformatics/btr521
- 511 Landa, J., & Antolínez, A. (2018). Weight-length relationships, weight conversion factors and  
512 somatic indices from two stocks of black anglerfish (*Lophius budegassa*) and white  
513 anglerfish (*L. piscatorius*) in north-eastern Atlantic waters. *Regional Studies in Marine*  
514 *Science*, 23, 87-96. doi:<https://doi.org/10.1016/j.rsma.2017.03.002>
- 515 Landa, J., Quincoces, I., Duarte, R., Fariña, A. C., & Dupouy, H. (2008). Movements of black and  
516 white anglerfish (*Lophius budegassa* and *L. piscatorius*) in the northeast Atlantic.  
517 *Fisheries Research*, 94(1), 1-12. doi:<https://doi.org/10.1016/j.fishres.2008.04.006>
- 518 Laurenson, C. H., Johnson, A., & Priede, I. G. (2005). Movements and growth of monkfish  
519 *Lophius piscatorius* tagged at the Shetland Islands, northeastern Atlantic. *Fisheries*  
520 *Research*, 71(2), 185-195. doi:<https://doi.org/10.1016/j.fishres.2004.08.020>
- 521 Leone, A., Álvarez, P., García, D., Saborido-Rey, F., & Rodríguez-Ezpeleta, N. (2019). Genome-  
522 wide SNP based population structure in European hake reveals the need for  
523 harmonizing biological and management units. *ICES Journal of Marine Science*.
- 524 Li, H. (2013). Aligning sequence reads, clone sequences and assembly contigs with BWA-MEM.  
525 *arXiv preprint arXiv:1303.3997*.

- 526 Li, H., Handsaker, B., Wysoker, A., Fennell, T., Ruan, J., Homer, N., . . . Subgroup, G. P. D. P.  
527 (2009). The Sequence Alignment/Map format and SAMtools. *Bioinformatics*, 25(16),  
528 2078-2079. doi:10.1093/bioinformatics/btp352
- 529 Maltby, K. M., Rutterford, L. A., Tinker, J., Genner, M. J., & Simpson, S. D. (2020). Projected  
530 impacts of warming seas on commercially fished species at a biogeographic boundary  
531 of the European continental shelf. *Journal of Applied Ecology*, n/a(n/a).  
532 doi:10.1111/1365-2664.13724
- 533 Mallet, J. (2007). Hybrid speciation. *Nature*, 446(7133), 279-283. doi:10.1038/nature05706
- 534 Marko, P. B., Lee, S. C., Rice, A. M., Gramling, J. M., Fitzhenry, T. M., McAlister, J. S., . . . Moran,  
535 A. L. (2004). Fisheries: mislabelling of a depleted reef fish. *Nature*, 430(6997), 309-310.  
536 doi:10.1038/430309b
- 537 Methot, R. D., & Wetzel, C. R. (2013). Stock synthesis: A biological and statistical framework for  
538 fish stock assessment and fishery management. *Fisheries Research*, 142, 86-99.  
539 doi:https://doi.org/10.1016/j.fishres.2012.10.012
- 540 Mirimin, L., Kerwath, S., Macey, B., Bester-van der Merwe, A., Lamberth, S., Bloomer, P., &  
541 Roodt-Wilding, R. (2014). Identification of naturally occurring hybrids between two  
542 overexploited sciaenid species along the South African coast. *Molecular Phylogenetics  
543 and Evolution*, 76, 30-33.
- 544 Montanari, S. R., Hobbs, J. P. A., Pratchett, M. S., Bay, L. K., & Van Herwerden, L. (2014). Does  
545 genetic distance between parental species influence outcomes of hybridization among  
546 coral reef butterflyfishes? *Molecular Ecology*, 23(11), 2757-2770.
- 547 Morgan, J. A. T., Harry, A. V., Welch, D. J., Street, R., White, J., Geraghty, P. T., . . . Ovenden, J.  
548 R. (2012). Detection of interspecies hybridisation in Chondrichthyes: hybrids and  
549 hybrid offspring between Australian (*Carcharhinus tilstoni*) and common (*C. limbatus*)  
550 blacktip shark found in an Australian fishery. *Conservation Genetics*, 13(2), 455-463.  
551 doi:10.1007/s10592-011-0298-6
- 552 Moritz, C., Dowling, T., & Brown, W. (1987). Evolution of animal mitochondrial DNA: relevance  
553 for population biology and systematics. *Annual Review of Ecology and Systematics*,  
554 18(1), 269-292.
- 555 Ofstad, L., Angus, C., Pedersen, T., & Steingrund, P. (2013). Age and growth of anglerfish  
556 (*Lophius piscatorius*) in Faroese waters. *Fisheries Research*, 139, 51-60.
- 557 Ovenden, J. R., Berry, O., Welch, D. J., Buckworth, R. C., & Dichmont, C. M. (2015). Ocean's  
558 eleven: a critical evaluation of the role of population, evolutionary and molecular  
559 genetics in the management of wild fisheries. *Fish and Fisheries*, 16(1), 125-159.  
560 doi:10.1111/faf.12052
- 561 Pampoulie, C., Gíslason, D., Ólafsdóttir, G., Chosson, V., Halldórsson, S. D., Mariani, S., . . .  
562 Víkingsson, G. A. (2020). Evidence of unidirectional hybridization and second-  
563 generation adult hybrid between the two largest animals on Earth, the fin and blue  
564 whales. *Evolutionary Applications*, n/a(n/a). doi:https://doi.org/10.1111/eva.13091
- 565 Purcell, S. (2009). PLINK 1.07. In.
- 566 Purcell, S., Neale, B., Todd-Brown, K., Thomas, L., Ferreira, M. A., Bender, D., . . . Daly, M. J.  
567 (2007). PLINK: a tool set for whole-genome association and population-based linkage  
568 analyses. *The American Journal of Human Genetics*, 81(3), 559-575.
- 569 Quincoces, I. (2002.). *CreCIMIENTO y reproducción de las especies" Lophius budegassa" Spinola  
570 1807 y" Lophius piscatorius" Linneo 1758, del Golfo de Vizcaya*. (PhD), Departamento  
571 de Zoología y Dinámica Celular Animal, Universidad del País Vasco (EHU/UPV), Spain.
- 572 Quincoces, I., Santurtún, M., & Lucio, P. (1998). Biological aspects of white anglerfish (*Lophius  
573 piscatorius*) in the Bay of Biscay (ICES Division VIIIa, b, d) in 1996–1997. *ICES CM*.
- 574 Relini, G. (1999). Synthesis of the knowledge on bottom fishery resources in Central  
575 Mediterranean (Italy and Corsica). *Biol Mar Medit*, 6(1), 276-291.
- 576 Rodríguez-Ezpeleta, N., Bradbury, I. R., Mendibil, I., Álvarez, P., Cotano, U., & Irigoien, X.  
577 (2016). Population structure of Atlantic mackerel inferred from RAD-seq-derived SNP

- 578 markers: effects of sequence clustering parameters and hierarchical SNP selection.  
579 *Molecular Ecology Resources*, 16(4), 991-1001. doi:10.1111/1755-0998.12518
- 580 Rodríguez-Ezpeleta, N., Díaz-Arce, N., Walter lii, J. F., Richardson, D. E., Rooker, J. R., Nøttestad,  
581 L., . . . Arrizabalaga, H. (2019). Determining natal origin for improved management of  
582 Atlantic bluefin tuna. *Frontiers in Ecology and the Environment*, 17(8), 439-444.  
583 doi:10.1002/fee.2090
- 584 Rousset, F. (2014). Genepop 4.3 for Windows/Linux/Mac OS X. *This documentation: July, 8,*  
585 *2014.*
- 586 Schwenke, P. (2013). *History and extent of introgressive hybridization in Puget Sound*  
587 *rockfishes (Sebastes auriculatus, S. caurinus, and S. maliger).*
- 588 Seehausen, O. (2006). Conservation: losing biodiversity by reverse speciation. *Current Biology*,  
589 16(9), R334-R337.
- 590 Sevilla, R. G., Diez, A., NorÉN, M., Mouchel, O., JÉRÔMe, M., Verrez-Bagnis, V., . . . Bautista, J.  
591 M. (2007). Primers and polymerase chain reaction conditions for DNA barcoding  
592 teleost fish based on the mitochondrial cytochrome b and nuclear rhodopsin genes.  
593 *Molecular Ecology Notes*, 7(5), 730-734. doi:10.1111/j.1471-8286.2007.01863.x
- 594 Stephenson, R. L. (2002). Stock structure and management structure: an ongoing challenge for  
595 ICES. *ICES marine science symposia*, 215, 305-314.
- 596 Stronen, A. V., & Paquet, P. C. (2013). Perspectives on the conservation of wild hybrids.  
597 *Biological Conservation*, 167, 390-395.
- 598 Team, R. C. (2018). R: A language and environment for statistical computing. R Foundation for  
599 Statistical Computing, Vienna, Austria. 2012. URL <http://www.R-project.org>.
- 600 Ungaro, N., Marano, G., Auteri, R., Voliani, A., Massutí, E., García-Rodríguez, M., & Osmani, K.  
601 (2002). Distribution, abundance and biological features of anglerfish (*Lophius*  
602 *piscatoirus* and *Lophius budegassa*)(Osteichthyes: Lphiiiformes) in the Mediterranean  
603 Sea. *Scientia Marina*, 66(S2), 55-63.
- 604 Verheyen, E., Salzburger, W., Snoeks, J., & Meyer, A. (2003). Origin of the superflock of cichlid  
605 fishes from Lake Victoria, East Africa. *Science*, 300(5617), 325-329.
- 606 Yaakub, S. M., Bellwood, D. R., van Herwerden, L., & Walsh, F. M. (2006). Hybridization in coral  
607 reef fishes: introgression and bi-directional gene exchange in *Thalassoma* (family  
608 Labridae). *Molecular Phylogenetics and Evolution*, 40(1), 84-100.

609 **Figure legends**

610

611 Figure 1. Samples included in this study, and in parentheses those genotyped with RAD-seq,  
612 where black triangles indicate *Lophius budegassa* samples and coloured circles, Mediterranean  
613 (red), Atlantic southern stock (purple), Atlantic northern stock (green) or Atlantic northern  
614 shelf stock (blue) *Lophius piscatorius* samples.

615

616 Figure 2. A. Specimen of anglerfish captured in the northern coast of Scotland (65 cm and 4.4  
617 kg) with white peritoneum, emerald green eyes, and stippled skin, genetically identified as  
618 black anglerfish. B. Agarose gel electrophoresis of the resulting PCR-RFLP band for white (*L.*  
619 *pis*) and black anglerfish (*L. bud*) showing that this specimen (Sample) is genetically identified  
620 as black anglerfish.

621

622 Figure 3. A. Principal Component Analysis (PC1=80.82%; PC2=0.26%) where main  
623 differentiated groups are circled. B. Individual ancestry proportions estimated by ADMIXTURE  
624 when assuming two ancestral populations. C. For each group identified in the PCA, whether  
625 individuals composing it are assigned to *L. piscatorius* (white fish or mitochondrion), *L.*  
626 *budegassa* (black fish or mitochondrion) or both according to visual or mitochondrial DNA  
627 based species identification, admixture pattern and assignment according to NewHybrids.

628

629 Figure 4. Proportion of hybrid (grey areas and numbers) and *L. budegassa* (black areas and  
630 numbers) individuals among those morphologically identified as *L. piscatorius* for each stock  
631 (large circles) and, within stocks, for smaller areas (small circles indicating number of sampled  
632 individuals per area). Colours refer to stocks as in Figure 1.

633

634 Figure 5. A. Principal Component Analysis (PCA) of samples genetically identified as white  
635 anglerfish when including (left) or not (right) Mediterranean samples. B. Individual ancestry  
636 proportions of samples genetically identified as white anglerfish estimated by ADMIXTURE  
637 when assuming two ancestral populations including (above) or not (below) Mediterranean  
638 samples.

639

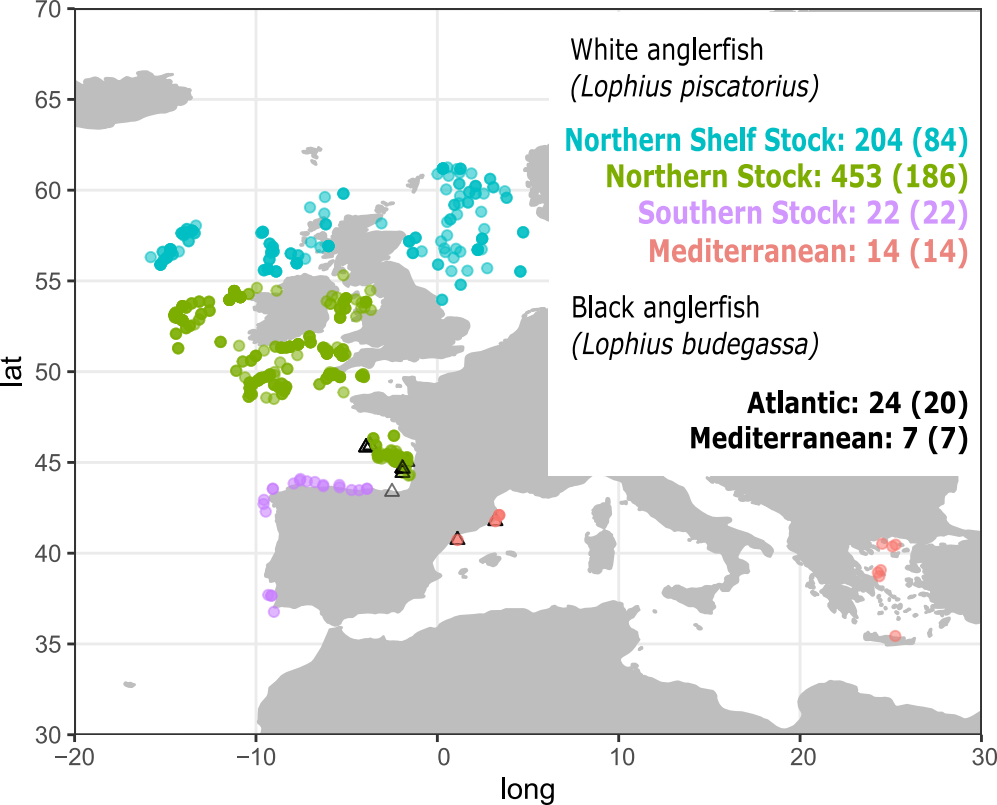



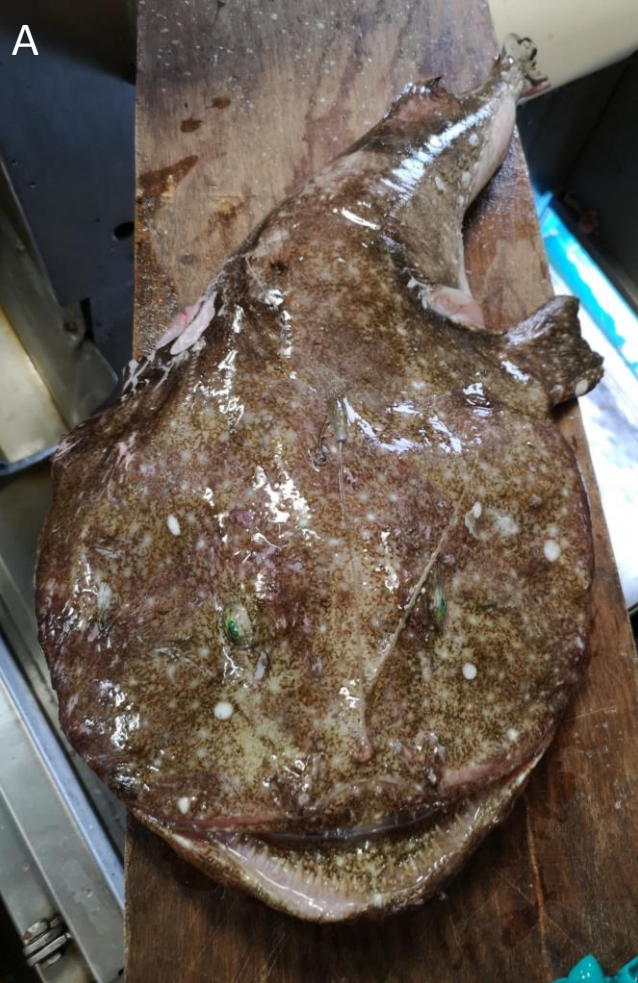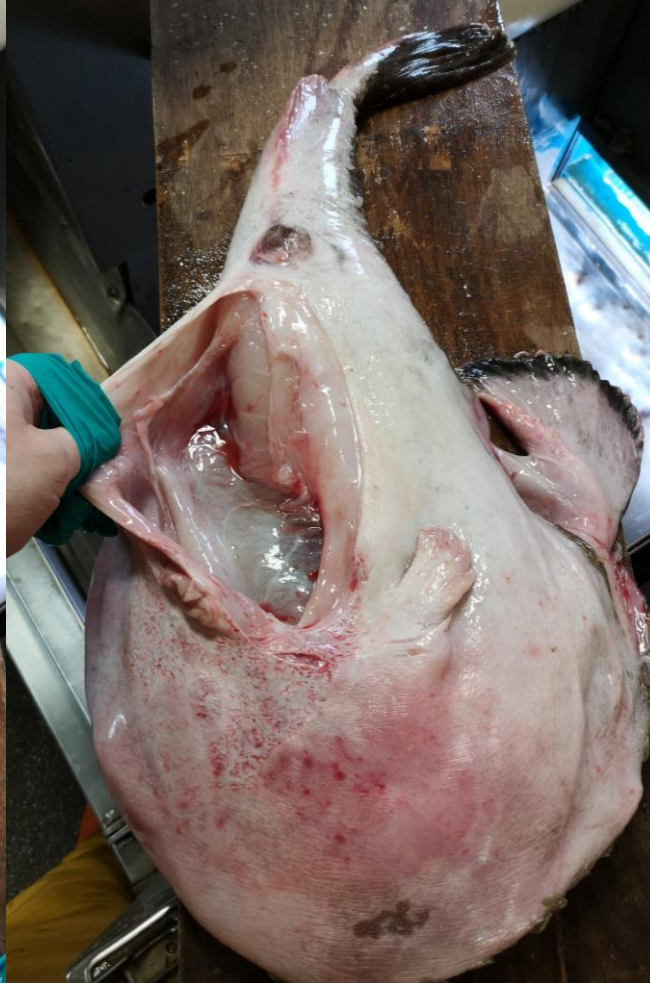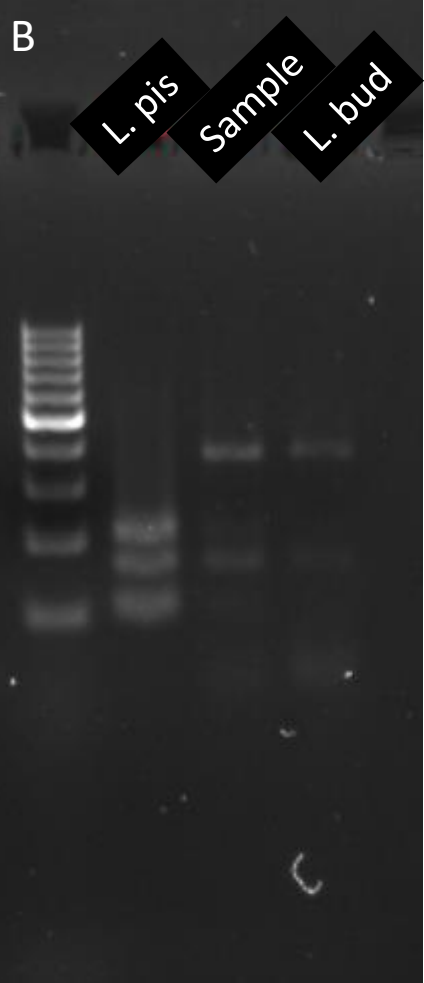

A

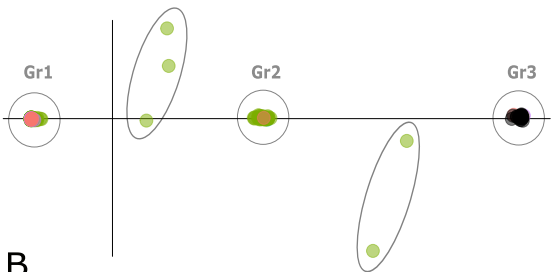

|                | Gr1 | Gr2 | Gr3 |
|----------------|-----|-----|-----|
| <b>N. Plat</b> | 82  | 2   | 0   |
| <b>North</b>   | 144 | 25  | 4   |
| <b>South</b>   | 20  | 0   | 2   |
| <b>Med</b>     | 6   | 1   | 5   |
| <b>Black</b>   | 0   | 0   | 27  |

B

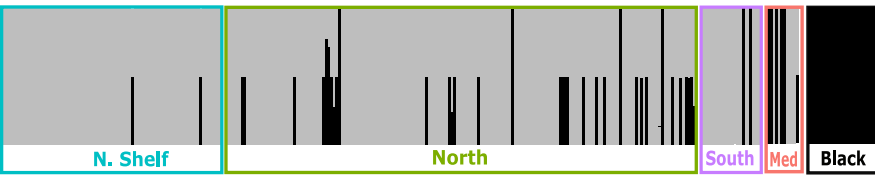

C

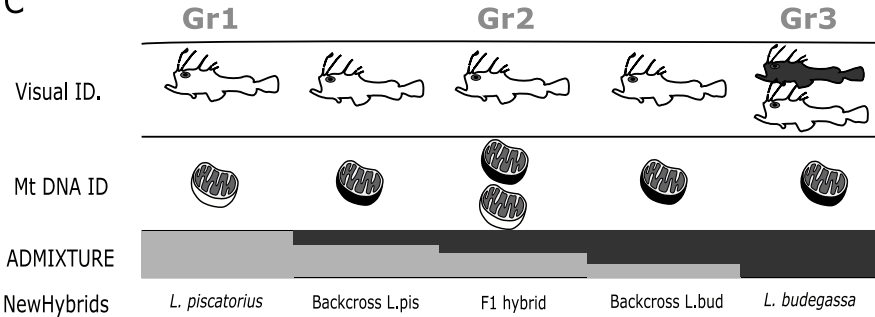

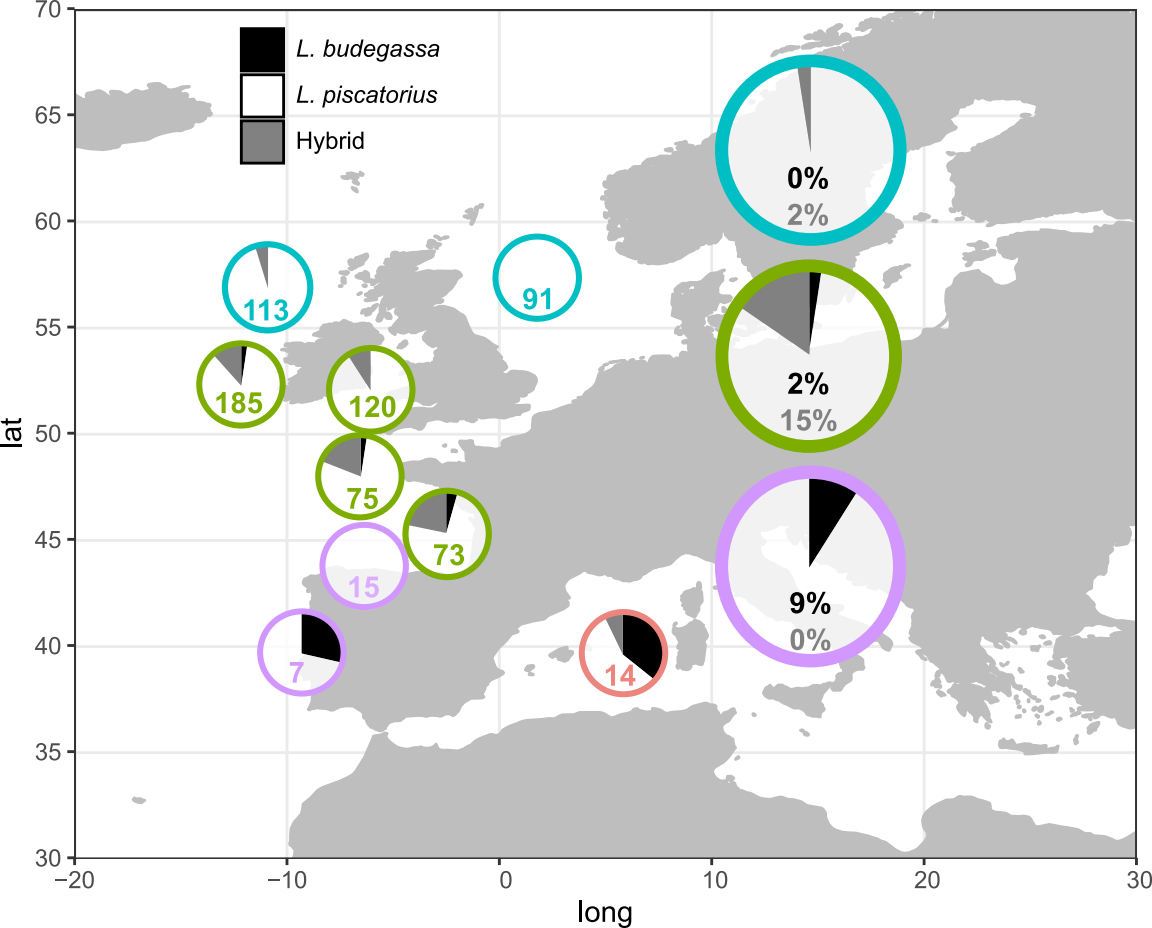

A

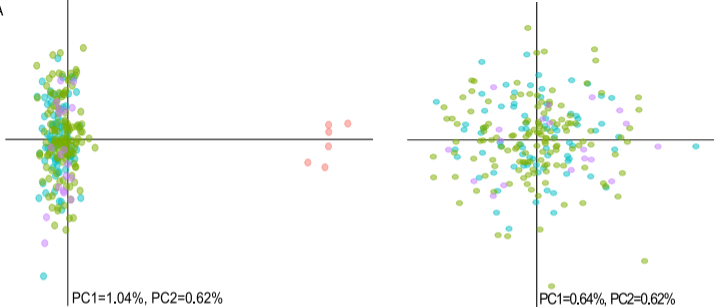

B

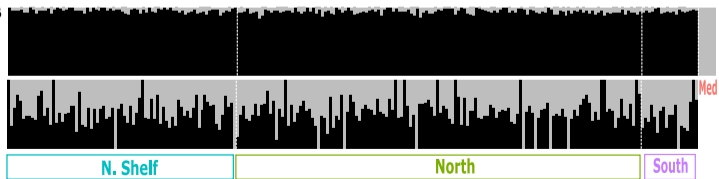

Source: https://www.biorxiv.org/content/biorxiv/early/2021/11/19/2021.02.10.430581.full.pdf
